# Supplementary material for: A Green Approach to Synthesis of 1,2,4-Triazolo-1,5-Benzothiazepine fused Pyrimidine Scaffolds by Cyclocondensation Reaction
Source: Research Square preprint supplement (doi:10.21203/rs.3.rs-8727726/v1), 2026-02-20
Supplement: Supplementary file 1 [file be3c3d9e3e7fed4e7b096324.docx]

**Supporting information**

**A Green Approach to Synthesis of 1,2,4-Triazolo-1,5-Benzothiazepine fused Pyrimidine Scaffolds by Cyclocondensation Reaction**

**Aruna Sharmaa*, Anjali Yadava, Rajesh Kumar Meenac, Hardik Pathakb*, Bhawana Jangira**

*aDepartment of Chemistry, JECRC University, Jaipur, Rajasthan, Pin-303905, India*

*bDepartment of Biotechnology, JECRC University, Jaipur-303905, Rajasthan, India.*

*cKalindi College, University of Delhi, Delhi-110008, India*

**E-mail:* [*arunasharma.ch@gmail.com*](mailto:arunasharma.ch@gmail.com)*, hardik.pathak@jecrcu.edu.in*

**Spectrum No. 1: IR Spectrum of 4-(3-methyldibenzo[b,f][1,2,4]triazolo[4,3-d][1,4]thiazepin-6-yl)-6-phenylpyrimidin-2-ol (2c)**

**Spectrum No. 2: IR Spectrum of 4-(3-methyldibenzo[b,f][1,2,4]triazolo[4,3-d][1,4]thiazepin-6-yl)-6-phenylpyrimidin-2-thiol (3c)**

**Spectrum No. 3: IR Spectrum of 4-(3-methyldibenzo[b,f][1,2,4]triazolo[4,3-d][1,4]thiazepin-6-yl)-6-phenylpyrimidin-2-amine(4c)**


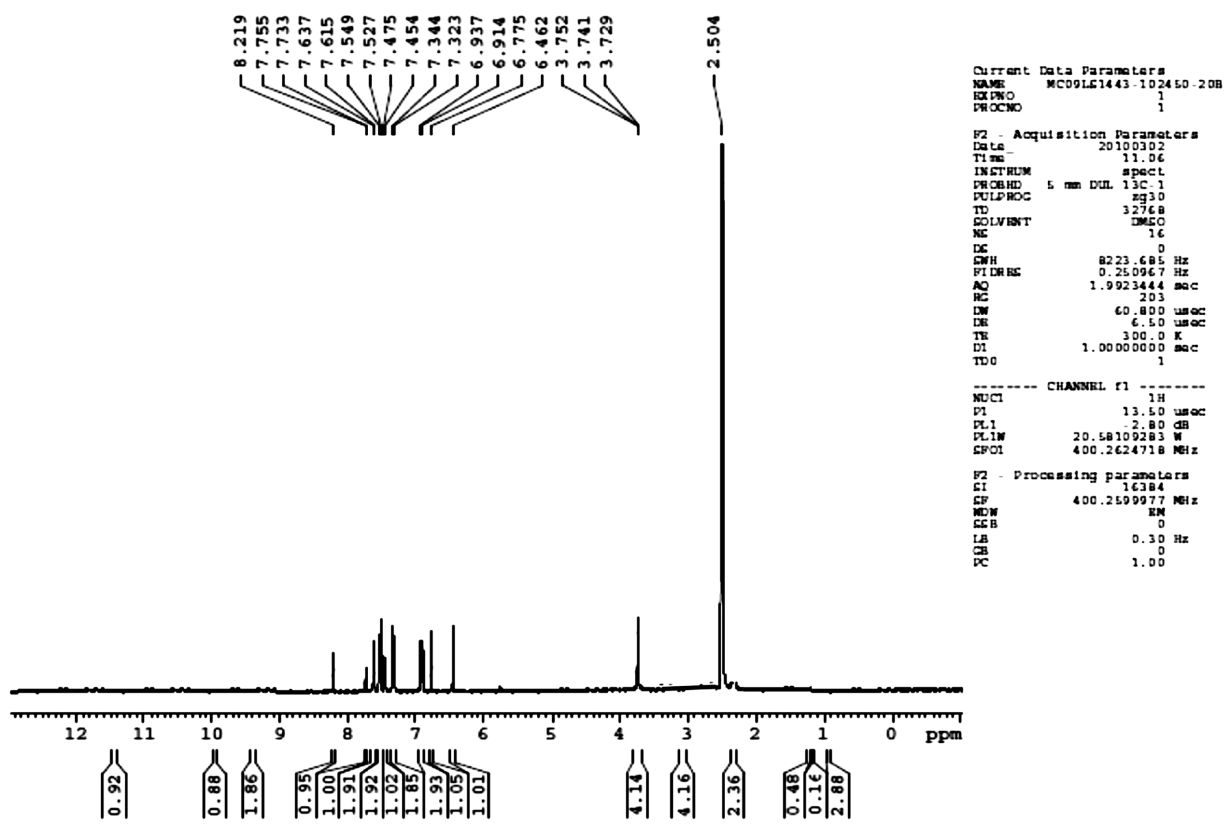


**Spectrum No. 4: 1H NMR Spectrum of 4-(3-methyldibenzo[b,f][1,2,4]triazolo[4,3-d][1,4]thiazepin-6-yl)-6-phenylpyrimidin-2-ol(2c)**


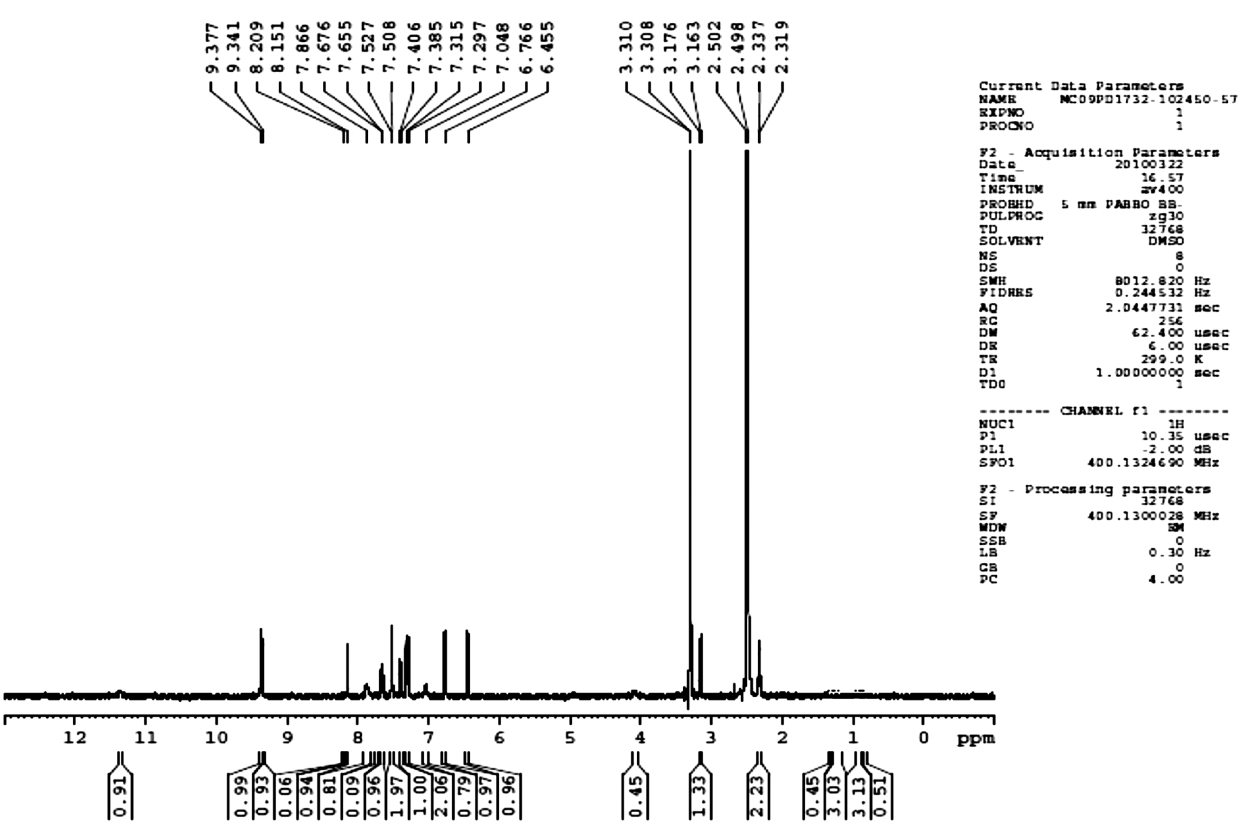


**Spectrum No. 4.5: 1H NMR Spectrum of 4-(3-methyldibenzo[b,f][1,2,4]triazolo[4,3-d][1,4]thiazepin-6-yl)-6-phenylpyrimidin-2-thiol(3c)**


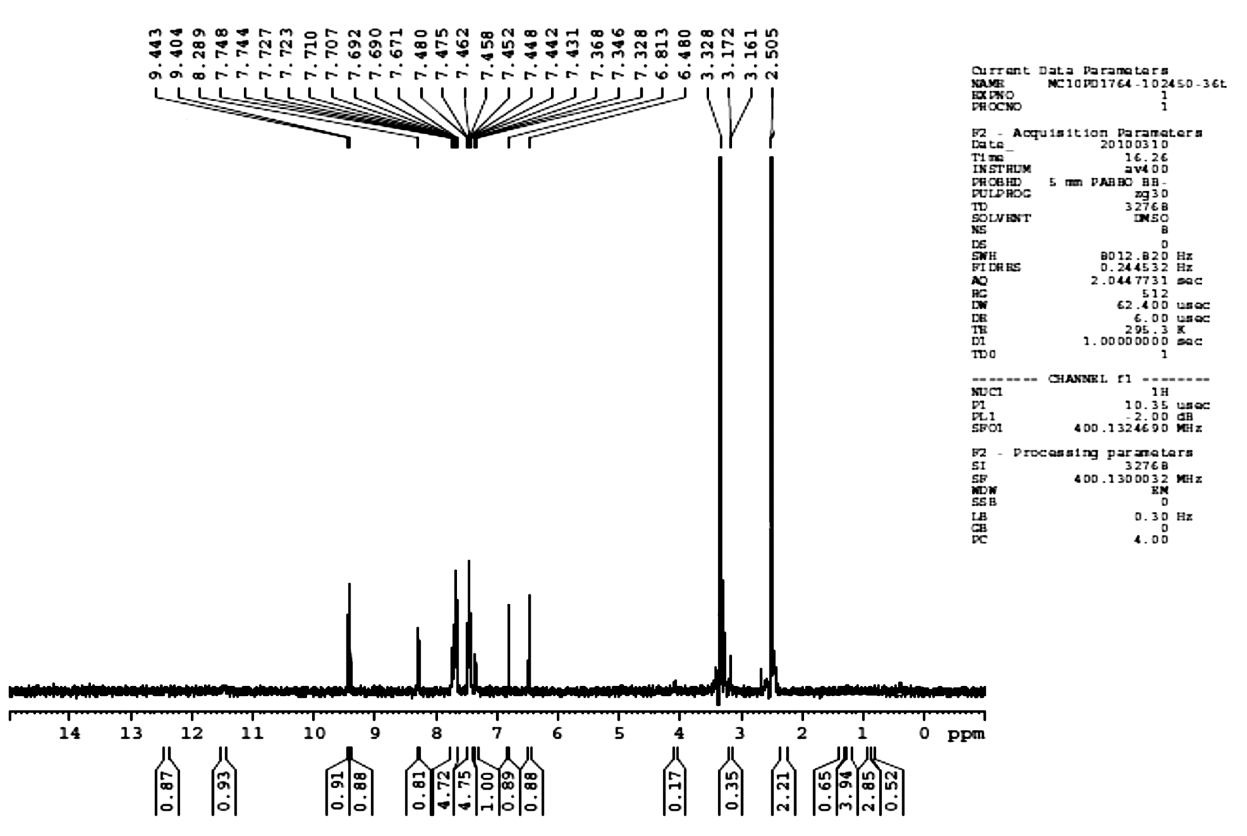


**Spectrum No. 4.6: 1H NMR Spectrum of 4-(3-methyldibenzo[b,f][1,2,4]triazolo[4,3-d][1,4]thiazepin-6-yl)-6-phenylpyrimidin-2-amine (4c)**


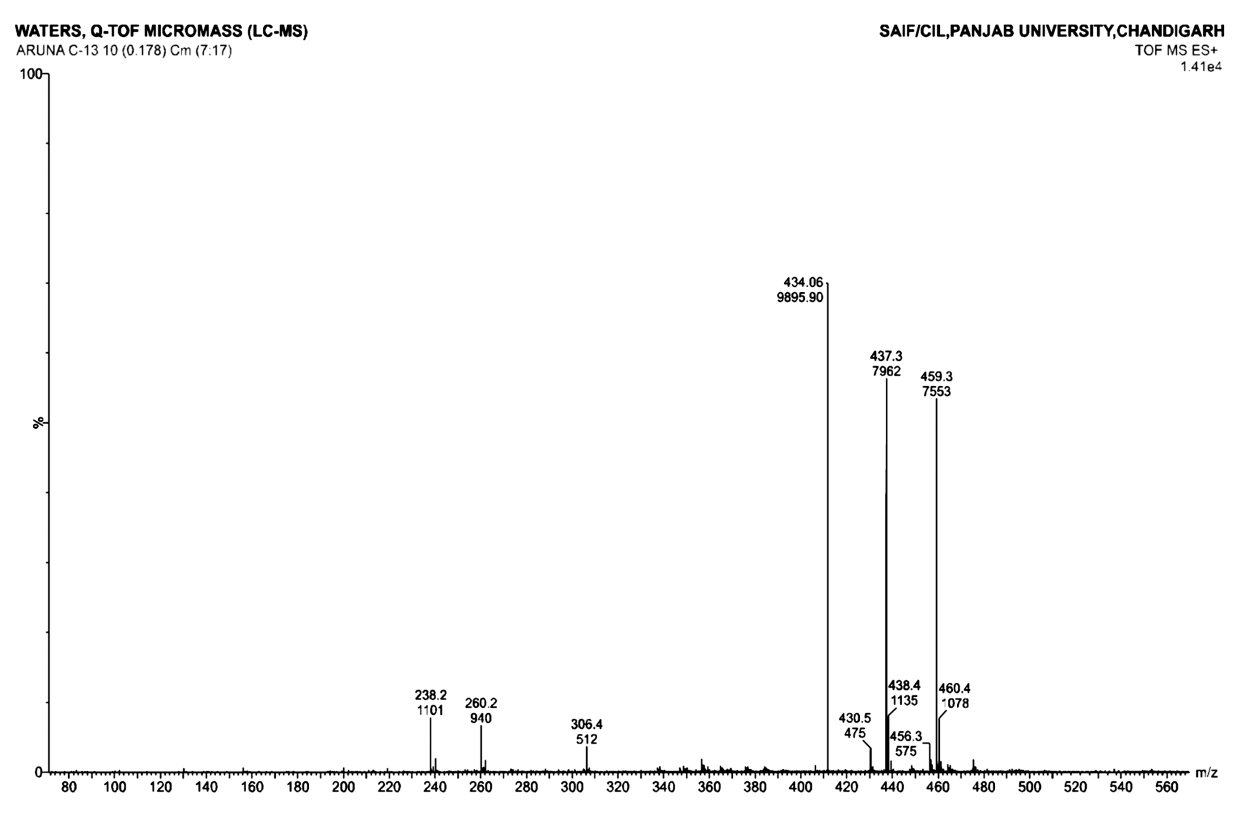


**Spectrum No. 4.7: Mass Spectrum of 4-(3-methyldibenzo[b,f][1,2,4]triazolo[4,3-d][1,4]thiazepin-6-yl)-6-phenylpyrimidin-2-ol (2c)**


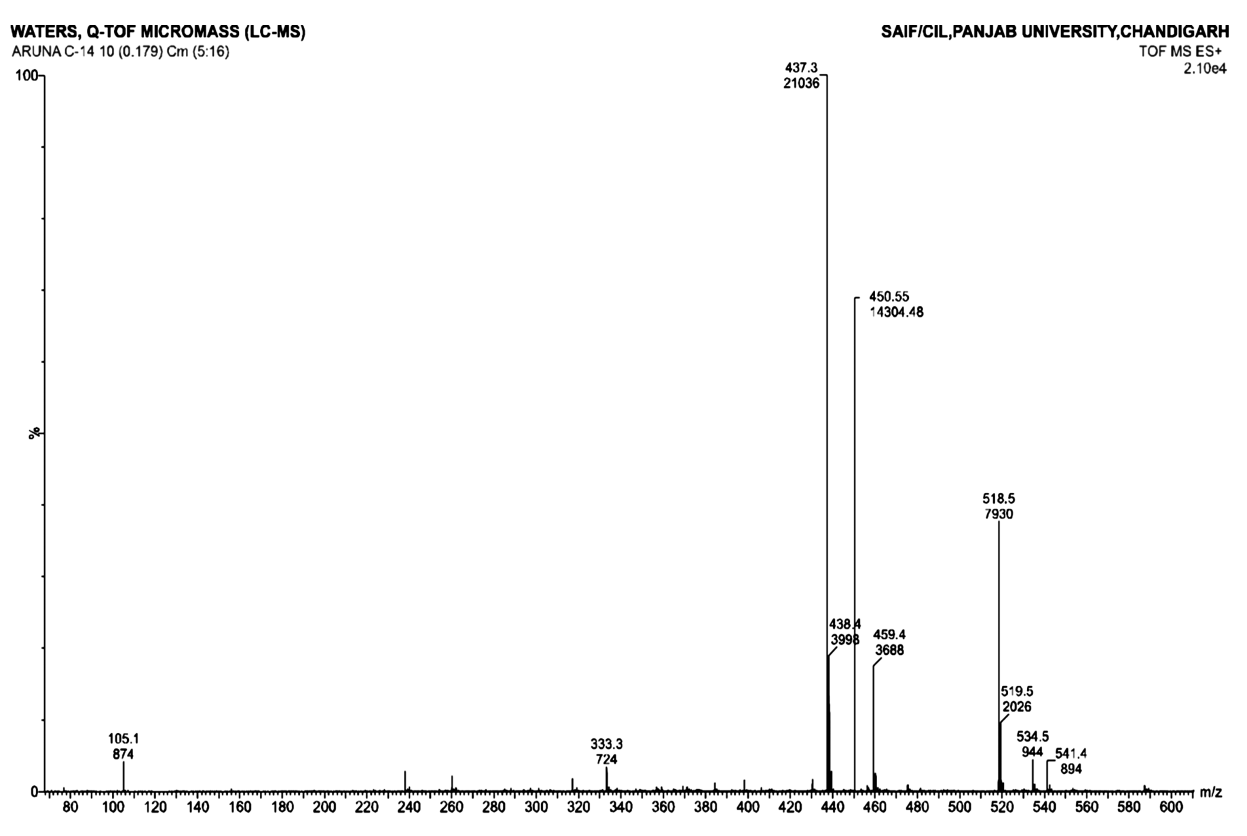


**Spectrum No. 4.8: Mass Spectrum of 4-(3-methyldibenzo[b,f][1,2,4]triazolo[4,3-d][1,4]thiazepin-6-yl)-6-phenylpyrimidin-2-thiol (3c)**


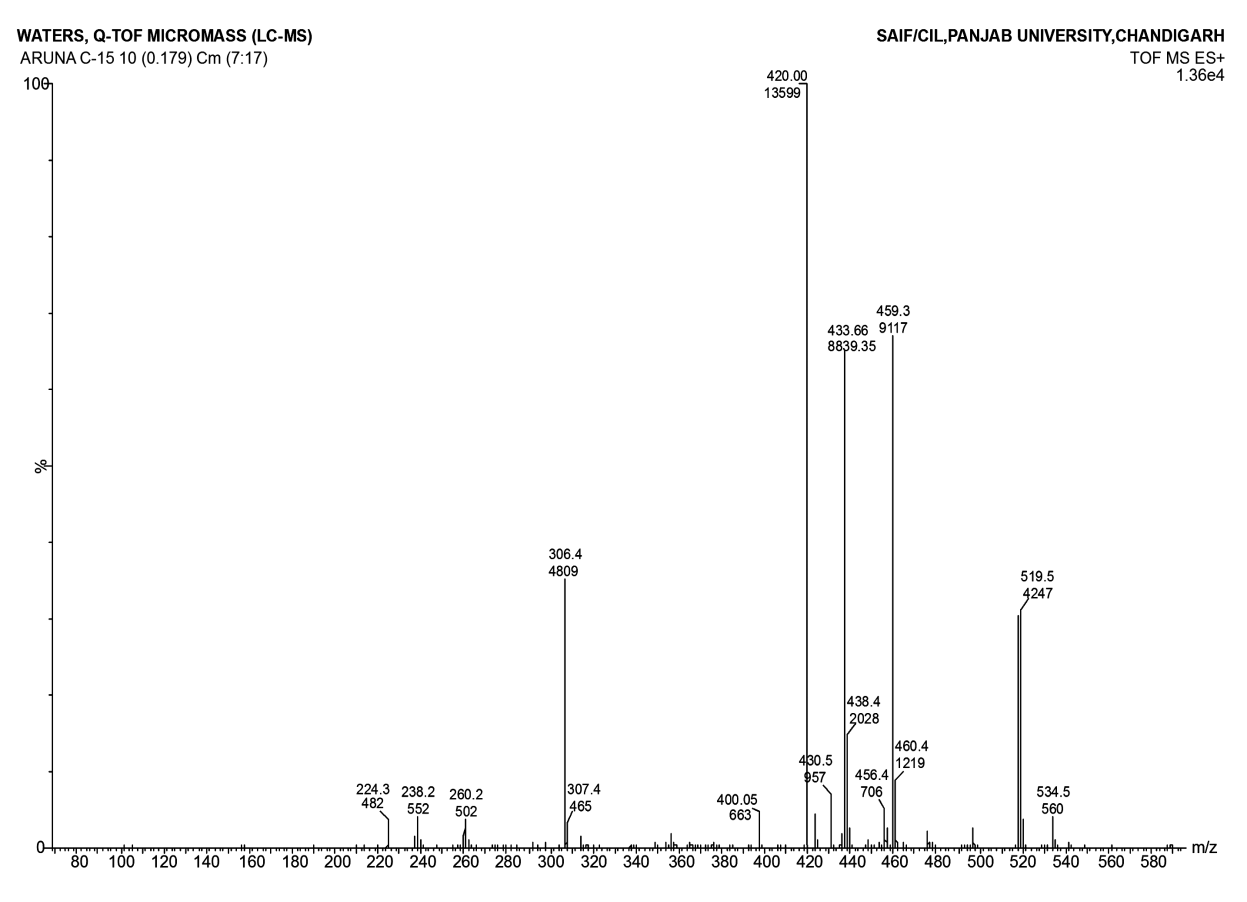


**Spectrum No. 4.9: Mass Spectrum of 4-(3-methyldibenzo[b,f][1,2,4]triazolo[4,3-d][1,4]thiazepin-6-yl)-6-phenylpyrimidin-2-amine (4c)**
